# Supplementary material for: Renewable amperometric immunosensor based on paraffin–graphite–transferrin antiserum biocomposite for transferrin assay
Source: Royal Society of Chemistry journal article supplement (doi:10.1039/b004005n), 2000-01-01
Supplement: figures.doc [file figures.doc]

**Electronic Supplementary Information:**

##### Renewable Amperometric Immunosensor Based on Paraffin-graphite-transferrin antiserum Biocomposite for Transferrin Assay

**Guo-dong Liu ke-sheng Hu Wei Li Guo-Li Shen Ru-Qin Yu ***

*College of Chemistry and Chemical Engineering, Institute for Chemometrics and Sensing Technology, Hunan University, Changsha, 410082, P. R. China*

2

1

3

4

5

**Fig. S1** Configuration of amperometric immunosensor: (1) PVC nut, (2) PVC tube (6mm i.d, 50mm length), (3) conducting graphite rod, (4) biocomposite, (5) electric wire connected with graphite rod.

**Fig. S2**  The effect of pH of substrate solution on response current. Conditions as in Fig.4 of the text.

(A) (B)

( C ) ( D )

**Fig. S3** The Effect of experimental parameters on the amperometric response of papraffin-graphite-transferrin antiserum electrodes. (A) theimmobilized transferrin antiserum loading with in the biocomposite; (B) the amount of labeled transferring; ( C ) the incubation time; (D) the incubation temperature . Other conditions as in Fig.4 of the text.
